# Supplementary material for: Chemical structure stabilities of a SixFy(x≤ 6,y≤ 12) series
Source: Royal Society of Chemistry journal article supplement (doi:10.1039/d1ra03526f), 2021-01-01
Supplement: d1ra03526f1.pdf [file d1ra03526f1.pdf]

Electronic Supplementary Information

**Chemical structure stabilities of  $\text{Si}_x\text{F}_y$  ( $x \leq 6$ ,  $y \leq 12$ ) series**

An-jiang Tang,<sup>\*a</sup> Qi-shan Huan,<sup>b</sup> Shi-yun Tang,<sup>a</sup> De-ju Wei,<sup>a</sup> Jun-jiang Guo<sup>a</sup> and Yu-han Zhao<sup>a</sup>

<sup>a</sup> School of Chemical Engineering, Guizhou Institute of Technology, Guiyang, China. E-mail: [tangaj2000@163.com](mailto:tangaj2000@163.com).

<sup>b</sup> School of Chemistry and Chemical Engineering, Guizhou University, Guiyang, China.

Table S1. The optimised structural parameters of  $\text{Si}_x\text{F}_y$  ( $x \leq 6, y \leq 12$ ) series

| molecular                      | Structure diagram                                                                   | Bond length R(Å)                                                                                                                                              | Bond angle A(°)                                                                                                                                                                                                                                                                                                                                      |
|--------------------------------|-------------------------------------------------------------------------------------|---------------------------------------------------------------------------------------------------------------------------------------------------------------|------------------------------------------------------------------------------------------------------------------------------------------------------------------------------------------------------------------------------------------------------------------------------------------------------------------------------------------------------|
| SiF                            | 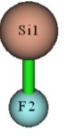   | R(2,1)1.626                                                                                                                                                   | /                                                                                                                                                                                                                                                                                                                                                    |
| SiF <sub>2</sub>               |    | R(3,1)1.616; R(3,2)1.616                                                                                                                                      | A(2,3,1)100.933                                                                                                                                                                                                                                                                                                                                      |
| SiF <sub>3</sub>               |    | R(4,1)1.600; R(3,1)1.600;<br>R(2,1)1.600                                                                                                                      | A(2,1,3)108.019; A(2,1,4)108.019; A(3,1,4)108.019                                                                                                                                                                                                                                                                                                    |
| SiF <sub>4</sub>               |    | R(5,1)1.579; R(4,1)1.579;<br>R(3,1)1.579; R(2,1)1.579                                                                                                         | A(2,1,3)109.471; A(2,1,4)109.471; A(2,1,5)109.471;<br>A(3,1,4)109.471; A(3,1,5)109.471; A(4,1,5)109.471                                                                                                                                                                                                                                              |
| Si <sub>2</sub> F <sub>6</sub> |   | R(8,2)1.593; R(7,2)1.593;<br>R(6,2)1.593; R(5,1)1.593;<br>R(4,1)1.593; R(3,1)1.593;<br>R(2,1)2.317                                                            | A(1,2,6)110.557; A(1,2,7)110.557; A(1,2,8)110.494;<br>A(6,2,7)108.385; A(6,2,8)108.374; A(7,2,8)108.399;<br>A(2,1,3)110.556; A(2,1,4)110.492; A(2,1,5)110.558;<br>A(3,1,4)108.374; A(3,1,5)108.386; A(4,1,5)108.399                                                                                                                                  |
| Si <sub>3</sub> F <sub>6</sub> |  | R(9,1)1.609; R(8,1)1.609;<br>R(7,3)1.609; R(6,2)1.609;<br>R(5,3)1.609; R(4,2)1.609;<br>R(3,2)2.390; R(3,1)2.390;<br>R(2,1)2.390                               | A(5,3,7)107.599; A(5,3,2)120.763; A(5,3,1)120.763;<br>A(7,3,2)120.763; A(7,3,1)120.763; A(2,3,1)59.998;<br>A(4,2,6)107.635; A(4,2,6)120.751; A(4,2,1)120.744;<br>A(6,2,3)120.751; A(6,2,1)120.744; A(3,2,1)60.006;<br>A(8,1,9)107.634; A(8,1,3)120.755; A(8,1,2)120.744;<br>A(9,1,3)120.755; A(9,1,2)120.744; A(3,1,2)59.996                         |
| Si <sub>3</sub> F <sub>8</sub> |  | R(11,10)2.336;<br>R(11,3)1.593;<br>R(11,1)1.595;<br>R(11,2)1.595;<br>R(10,9)2.336;<br>R(10,8)1.608;<br>R(10,7)1.608; R(9,6)1.593;<br>R(9,5)1.595; R(9,4)1.595 | A(2,11,1)107.982; A(2,11,3)108.460; A(2,11,10)110.226;<br>A(1,11,3)108.460; A(1,11,10)110.226; A(3,11,10)111.394;<br>A(7,10,8)108.268; A(7,10,9)107.593; A(7,10,11)107.593;<br>A(8,10,9)107.593; A(8,10,11)107.593; A(9,10,11)117.888;<br>A(4,9,5)107.982; A(4,9,6)108.460; A(4,9,10)110.226;<br>A(5,9,6)108.460; A(5,9,10)110.226; A(6,9,10)111.394 |
| Si <sub>4</sub> F <sub>8</sub> |                                                                                     | R(12,5)1.609;<br>R(12,6)1.609;<br>R(12,2)2.375;<br>R(12,1)2.375;<br>R(11,2)1.609;                                                                             | A(6,12,5)108.342; A(6,12,2)114.482; A(6,12,1)114.401;<br>A(5,12,2)114.459; A(5,12,1)114.464; A(2,12,1)90.000;<br>A(9,3,10)108.342; A(9,3,2)114.421; A(9,3,1)114.492;<br>A(10,3,2)114.443; A(10,3,1)114.449; A(2,3,1)90.000;<br>A(4,2,11)108.342; A(4,2,12)114.403; A(4,2,3)114.473;                                                                  |

|                                 |                                                                                     |                                                                                                                                                                                                                                                          |                                                                                                                                                                                                                                                                                                                                                                                                                                                                                                                                                                                   |
|---------------------------------|-------------------------------------------------------------------------------------|----------------------------------------------------------------------------------------------------------------------------------------------------------------------------------------------------------------------------------------------------------|-----------------------------------------------------------------------------------------------------------------------------------------------------------------------------------------------------------------------------------------------------------------------------------------------------------------------------------------------------------------------------------------------------------------------------------------------------------------------------------------------------------------------------------------------------------------------------------|
|                                 | 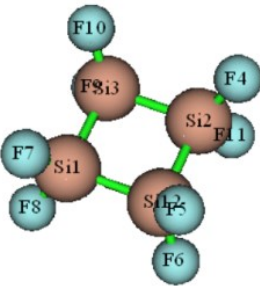   | R(10,3)1.609; R(9,3)1.609;<br>R(8,1)1.609; R(7,1)1.609;<br>R(4,2)1.609; R(3,2)2.375;<br>R(3,1)2.375                                                                                                                                                      | A(11,2,12)114.461; A(11,2,3)114.466; A(12,2,3)90.000;<br>A(7,1,8)108.342; A(7,1,12)114.492; A(7,1,3)114.410;<br>A(8,1,12)114.448; A(8,1,3)114.455; A(12,1,3)90.000                                                                                                                                                                                                                                                                                                                                                                                                                |
| Si <sub>4</sub> F <sub>10</sub> |    | R(14,1)1.595;<br>R(13,1)1.595;<br>R(12,1)1.594;<br>R(11,2)1.612;<br>R(10,2)1.608; R(9,4)1.595;<br>R(8,4)1.595; R(7,4)1.594;<br>R(6,3)1.612; R(5,3)1.608;<br>R(4,3)2.336; R(3,2)2.356;<br>R(2,1)2.336                                                     | A(3,4,7)113.045; A(3,4,8)109.371; A(3,4,9)109.376;<br>A(7,4,8)108.305; A(7,4,9)108.357; A(8,4,9)108.273;<br>A(2,3,4)114.469; A(2,3,5)110.198; A(2,3,6)106.220;<br>A(4,3,5)109.141; A(4,3,6)108.634; A(5,3,6)107.948;<br>A(1,2,3)114.450; A(1,2,10)109.141; A(1,2,11)108.633;<br>A(3,2,10)110.202; A(3,2,11)106.240; A(10,2,11)107.945;<br>A(2,1,12)113.027; A(2,1,13)109.387; A(2,1,14)109.380;<br>A(12,1,13)108.358; A(12,1,14)108.307; A(13,1,14)108.268                                                                                                                        |
| Si <sub>5</sub> F <sub>10</sub> |   | R(15,1)1.611;<br>R(14,1)1.609;<br>R(13,2)1.611;<br>R(12,2)1.609;<br>R(11,3)1.612;<br>R(10,3)1.608; R(9,4)1.613;<br>R(8,4)1.608; R(7,5)1.613;<br>R(6,5)1.608; R(5,1)2.380;<br>R(5,4)2.375; R(4,3)2.375;<br>R(3,2)2.380; R(2,1)2.384                       | A(6,5,7)108.134; A(6,5,1)112.577; A(6,5,4)113.004;<br>A(7,5,1)108.325; A(7,5,4)108.323; A(1,5,4)106.317;<br>A(8,4,9)108.128; A(8,4,5)113.312; A(8,4,3)113.278;<br>A(9,4,5)108.034; A(9,4,3)108.036; A(5,4,3)105.825;<br>A(10,3,11)108.134; A(10,3,4)112.877; A(10,3,2)112.441;<br>A(11,3,4)108.421; A(11,3,2)108.406; A(4,3,2)106.416;<br>A(12,2,13)108.128; A(12,2,3)111.197; A(12,2,1)111.002;<br>A(13, 2,3)109.669; A(13,2,1)109.645; A(3,2,1)107.193;<br>A(14,1,15)108.129; A(14,1,5)111.413; A(14,1,2)111.175;<br>A(15,1,5)109.502; A(15,1,2)109.474; A(5,1,2)107.131        |
| Si <sub>5</sub> F <sub>12</sub> |  | R(17,5)1.596;<br>R(16,5)1.594;<br>R(15,5)1.594;<br>R(14,4)1.611;<br>R(13,4)1.609;<br>R(12,2)1.613;<br>R(11,2)1.613;<br>R(10,3)1.609; R(9,3)1.611;<br>R(8,1) 1.594; R(7,1)1.596;<br>R(6,1)1.594; R(5,4)2.339;<br>R(4,2)2.354; R(3,1)2.339;<br>R(3,2)2.354 | A(4,5,15)110.648; A(4,5,16)113.022; A(4,5,17)108.19;<br>A(15,5,16)108.271; A(15,5,17)108.171;<br>A(16,5,17)108.402; A(2,4,5)115.066; A(2,4,13)109.555;<br>A(2,4,14)106.280; A(5,4,13)108.837; A(5,4,14)108.881;<br>A(13,4,14)107.989; A(2,3,1)115.080; A(2,3,9)106.269;<br>A(2,3,10)109.558; A(1,3,9)108.875; A(1,3,10)108.837;<br>A(9,3,10)107.989; A(3,2,4)115.919; A(3,2,11)106.572;<br>A(3,2,12)109.964; A(4,2,11)109.958; A(4,2,12)106.571;<br>A(11,2,12)107.608; A(3,1,6)110.645; A(3,1,7)108.208;<br>A(3,1,8)113.014; A(6,1,7)108.173; A(6,1,8)108.272;<br>A(7,1,8)108.400 |
| Si <sub>6</sub> F <sub>12</sub> |                                                                                     | R(18,6)1.609;<br>R(17,6)1.614;<br>R(16,5)1.614;<br>R(15,5)1.609;<br>R(14,4)1.614;                                                                                                                                                                        | A(17,6,18)108.440; A(17,6,5)106.920; A(17,6,1)106.926;<br>A(18,6,5)110.641; A(18,6,1)110.694; A(5,6,1)112.980;<br>A(15,5,16)108.454; A(15,5,6)110.729; A(15,5,4)110.683;<br>A(16,5,6)106.786; A(16,5,4)106.816; A(6,5,4)113.117;<br>A(13,4,14)108.434; A(13,4,5)110.688; A(13,4,3)110.768;                                                                                                                                                                                                                                                                                        |

|  |                                                                                   |                                                                                                                                                                                                  |                                                                                                                                                                                                                                                                                                                                                                                                  |
|--|-----------------------------------------------------------------------------------|--------------------------------------------------------------------------------------------------------------------------------------------------------------------------------------------------|--------------------------------------------------------------------------------------------------------------------------------------------------------------------------------------------------------------------------------------------------------------------------------------------------------------------------------------------------------------------------------------------------|
|  | 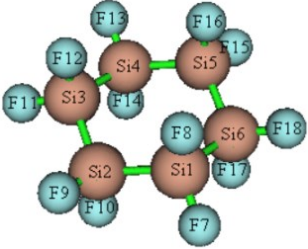 | R(13,4)1.609;<br>R(12,3)1.614;<br>R(11,3)1.609;<br>R(10,2)1.614; R(9,2)1.609;<br>R(8,1)1.614; R(7,1)1.609;<br>R(6,5)2.366; R(6,1)2.367;<br>R(5,4)2.366; R(4,3)2.366;<br>R(3,2)2.366; R(2,1)2.366 | A(14,4,5)106.860; A(14,4,3)106.817; A(5,4,3)113.021;<br>A(11,3,12)108.441; A(11,3,4)110.697; A(11,3,2)110.640;<br>A(12,3,4)106.926; A(12,3,2)106.920; A(4,3,2)112.978;<br>A(9,2,10)108.455; A(9,2,3)110.729; A(9,2,1)110.687;<br>A(10,2,3)106.783; A(10,2,1)106.808; A(3,2,1)113.122;<br>A(7,1,8)108.433; A(7,1,6)110.764; A(7,1,2)110.683;<br>A(8,1,6)106.820; A(8,1,2)106.869; A(6,1,2)113.019 |
|--|-----------------------------------------------------------------------------------|--------------------------------------------------------------------------------------------------------------------------------------------------------------------------------------------------|--------------------------------------------------------------------------------------------------------------------------------------------------------------------------------------------------------------------------------------------------------------------------------------------------------------------------------------------------------------------------------------------------|

Table S2. The theoretical and experimental frequency of optimised  $\text{Si}_x\text{F}_y$  ( $x \leq 6$ ,  $y \leq 12$ ) series

| molecular                       | Theoretical value (vibration intensity>1)                                                                                                                                                                                                                                       | Correction value (0.9614)                                                                                                                                                            | Experimental value             | error               |
|---------------------------------|---------------------------------------------------------------------------------------------------------------------------------------------------------------------------------------------------------------------------------------------------------------------------------|--------------------------------------------------------------------------------------------------------------------------------------------------------------------------------------|--------------------------------|---------------------|
| SiF                             | 866.98(90)                                                                                                                                                                                                                                                                      | 833.51                                                                                                                                                                               | /                              | /                   |
| SiF <sub>2</sub>                | 315.76(17); 835.25(106); 866.67(130)                                                                                                                                                                                                                                            | 303.57; 803.00; 833.22                                                                                                                                                               | 855 <sup>[1]</sup>             | 2.34; 0.49          |
| SiF <sub>3</sub>                | 278.40(10); 395.99(56);<br>827.18(59); 972.66(150)                                                                                                                                                                                                                              | 267.65; 380.70; 795.25; 935.12                                                                                                                                                       | /                              | /                   |
| SiF <sub>4</sub>                | 378.48(45); 1046.15(201)                                                                                                                                                                                                                                                        | 363.87; 1005.77                                                                                                                                                                      | 390; 1031 <sup>[2]</sup>       | 2.44                |
| Si <sub>2</sub> F <sub>6</sub>  | 98.08(4); 99.95(4); 300.76(27); 392.87(203);<br>822.33(229); 1005.23(282)                                                                                                                                                                                                       | 94.29; 96.09; 289.66; 377.71;<br>790.59; 966.43                                                                                                                                      | 104; 308; 992 <sup>[3-6]</sup> | 7.69; 6.17;<br>2.77 |
| Si <sub>3</sub> F <sub>6</sub>  | 83.01(7); 302.20(63); 487.23(37); 861.92(232);<br>957.21(315)                                                                                                                                                                                                                   | 79.81; 290.54; 468.42; 828.65;<br>920.26                                                                                                                                             | /                              | /                   |
| Si <sub>3</sub> F <sub>8</sub>  | 87.25(6); 118.21(4); 165.59(2); 230.23(4);<br>301.25(30); 310.68(44); 325.82(21);<br>356.21(16); 368.84(236); 491.43(24);<br>589.29(7); 837.87(151); 860.30(201);<br>909.34(2); 963.32(55); 994.80(74);<br>998.91(318); 1002.96(206)                                            | 83.88; 113.65; 159.20; 221.23;<br>289.60; 298.69; 313.24; 342.46;<br>354.60; 472.46; 566.54; 805.53;<br>827.09; 874.24; 926.14; 956.40;<br>960.35; 964.25                            | /                              | /                   |
| Si <sub>4</sub> F <sub>8</sub>  | 91.14(9); 171.05(3); 305.12(102); 524.43(79);<br>886.95(243); 971.71(387)                                                                                                                                                                                                       | 87.62; 164.45; 293.34; 504.19;<br>852.71; 934.20                                                                                                                                     | /                              | /                   |
| Si <sub>4</sub> F <sub>10</sub> | 91.63(6); 124.83(11); 235.09 (7); 296.31(94);<br>309.14(3); 316.21(14); 339.20(49);<br>348.93(245); 364.77(29); 464.09(19);<br>528.71(15); 611.84(4); 840.39(290);<br>846.97(53); 878.88(132); 955.53(29);<br>960.14(106); 994.23(52); 996.01(116);<br>998.13(281); 998.96(163) | 92.90; 120.01; 226.02; 284.87;<br>297.21; 304.00; 326.11; 335.46;<br>350.69; 446.18; 508.30; 588.22;<br>807.95; 814.28; 844.96; 918.65;<br>923.08; 955.85; 957.56; 956.60;<br>960.40 | /                              | /                   |
| Si <sub>5</sub> F <sub>10</sub> | 69.56(5) 84.80(3); 160.19(3); 167.75(3);<br>249.04(4); 254.86(5); 310.21(126); 320.98(9);<br>513.08(115); 852.93(43); 883.95(272);<br>915.45(2); 955.07(18); 958.14(12); 958.33(4);<br>959.04(29); 968.19(427)                                                                  | 66.87; 81.53; 154.01; 161.27;<br>239.43; 245.02; 298.24; 308.59;<br>493.28; 820.01; 849.83; 880.11;<br>918.20; 921.16; 921.34; 922.02;<br>930.82                                     | /                              | /                   |

|                                 |                                                                                                                                                                                                                                                                                                                                                                       |                                                                                                                                                                                                                                                |   |   |
|---------------------------------|-----------------------------------------------------------------------------------------------------------------------------------------------------------------------------------------------------------------------------------------------------------------------------------------------------------------------------------------------------------------------|------------------------------------------------------------------------------------------------------------------------------------------------------------------------------------------------------------------------------------------------|---|---|
| Si <sub>5</sub> F <sub>12</sub> | 83.81(7); 91.79(2); 130.79(17); 245.12(29);<br>290.80(161); 306.66(33); 316.73(2);<br>317.47(29); 326.09(34); 330.25(214);<br>351.66(9); 368.91(12); 443.27(7); 491.64(34);<br>559.92(10); 632.54(3); 843.18(164);<br>844.06(220); 861.58(54); 883.24(165);<br>910.40(2); 948.43(26) 959.24(24);<br>961.53(160); 993.13(104); 993.70(106);<br>998.06(61); 998.69(292) | 80.57; 88.25; 125.74; 235.66;<br>279.58; 294.82; 304.50; 305.22;<br>313.50; 317.50; 338.09; 354.67;<br>426.16; 472.66; 538.31; 608.12;<br>810.63; 811.48; 828.58; 849.15;<br>875.26; 911.82; 922.21; 924.41;<br>954.80; 955.34; 959.53; 960.14 | / | / |
| Si <sub>6</sub> F <sub>12</sub> | 47.84(5); 101.83(3); 155.98(11); 201.03(10);<br>221.72(9); 325.66(156); 350.75(25);<br>482.70(130); 483.10(13); 847.00(158);<br>881.09(23); 881.20(234); 953.95(11);<br>954.50(121); 968.52(32)                                                                                                                                                                       | 45.99; 97.90; 149.89; 193.27;<br>213.16; 313.09; 337.21; 464.07;<br>464.45; 814.31; 847.08; 847.19;<br>916.34; 917.66; 931.14                                                                                                                  | / | / |

Table S3. Si-Si and Si-F Mayer bond orders of Si<sub>x</sub>F<sub>y</sub> (x ≤ 6, y ≤ 12) series

| Species                         | Si-Si bond order                                                                         | Si-F bond order                                                                                                                                                                       |
|---------------------------------|------------------------------------------------------------------------------------------|---------------------------------------------------------------------------------------------------------------------------------------------------------------------------------------|
| SiF                             | /                                                                                        | B(1,2)0.9863                                                                                                                                                                          |
| SiF <sub>2</sub>                | /                                                                                        | B(1,3)1.0171; B(2, 3)1.0171                                                                                                                                                           |
| SiF <sub>3</sub>                | /                                                                                        | B(1,2)0.9872; B(1,3)0.9872; B(2,3)0.9872                                                                                                                                              |
| SiF <sub>4</sub>                | /                                                                                        | B(1,2)1.0538; B(1,3)1.0538; B(1,4)1.0538; B(1,5)1.0538                                                                                                                                |
| Si <sub>2</sub> F <sub>6</sub>  | B(1,2)0.8471                                                                             | B(1,3)1.0370; R(1,4)1.0370; B(1,5)1.0371; B(2,6)1.0370; B(2,7)1.0371;<br>B(2,8)1.0370                                                                                                 |
| Si <sub>3</sub> F <sub>6</sub>  | B(1,2)0.6521; B(1,3)0.6521;<br>B(2,3)0.6520                                              | B(1,8)1.0203; B(1,9)1.0203; B(2,4)1.0203; B(2,6)1.0203; B(3,5)1.0203;<br>B(3,7)1.0203                                                                                                 |
| Si <sub>3</sub> F <sub>8</sub>  | B(9,10)0.7884;<br>B(10,11)0.7884                                                         | B(1,11)1.0354; B(2,11)1.0354; B(3,11)1.0366; B(4,9)1.0354; B(5,9)1.0354;<br>B(6,9)1.0366; B(7,10)1.0217; B(8,10)1.0217                                                                |
| Si <sub>4</sub> F <sub>8</sub>  | B(1,2)0.0718; B(1,3)0.7614;<br>B(2,3)0.7614; B(2,12)0.7614;<br>B(3,12)0.0718             | B(1,7)1.0233; B(1,8)1.0233; B(2,4)1.0232; B(2,11)1.0234; B(3,9)1.0233;<br>B(3,10)1.0233; B(5,12)1.0233; B(6,12)1.0233                                                                 |
| Si <sub>4</sub> F <sub>10</sub> | B(1,2)0.7848; B(2,3)0.7312;<br>B(3,4)0.7848                                              | B(1,12)1.0409; B(1,13)1.0316; B(1,14)1.0324; B(2,10)1.0335; B(2,11)1.0157;<br>B(3,5)1.0335; B(3,6)1.0157; B(4,7)1.0410; B(4,8)1.0324; B(4,9)1.0315                                    |
| Si <sub>5</sub> F <sub>10</sub> | B(1,2)0.7031; B(1,5)0.7086;<br>B(2,3)0.7078; B(3,4)0.7133;<br>B(4,5)0.7136               | B(1,14)1.0337; B(1,15)1.0228; B(2,12)1.0327; B(2,13)1.0241; B(3,10)1.0403;<br>B(3,11)1.0134; B(4,8)1.0427; B(4,9)1.0090; B(5,6)1.0409; B(5,7)1.0124                                   |
| Si <sub>5</sub> F <sub>12</sub> | B(1,3)0.7872; B(2,3)0.7288;<br>B(2,4)0.7289; B(4,5)0.7872                                | B(1,6)1.0386; B(1,7)1.0264; B(1,8)1.0412; B(2,11)1.0224; B(2,12)1.0224;<br>B(3,9)1.0152; B(3,10)1.0318; B(4,13)1.0317; B(4,14)1.0153; B(5,15)1.0386;<br>B(5,16)1.0412; B(5,17)1.0263  |
| Si <sub>6</sub> F <sub>12</sub> | B(1,2)0.7177; B(1,6)0.7176;<br>B(2,3)0.7178; B(3,4)0.7178;<br>B(4,5)0.7178; B(5,6)0.7177 | B(1,7)1.0346; B(1,8)1.0119; B(2,9)1.0346; B(2,10)1.0116; B(3,11)1.0341;<br>B(3,12)1.0124; B(4,13)1.0346; B(4,14)1.0119; B(5,15)1.0346; B(5,16)1.0116;<br>B(6,17)1.0124; B(6,18)1.0341 |

Table S4. Natural population analysis results of  $\text{Si}_x\text{F}_y$  ( $x \leq 6, y \leq 12$ ) series

| Mol                            | Ato   | No     | Natural charge | Natural Population |         |         |         | Natural Electron Configuration                |
|--------------------------------|-------|--------|----------------|--------------------|---------|---------|---------|-----------------------------------------------|
|                                |       |        |                | Cor                | Val     | Ryd     | Total   |                                               |
| SiF                            | Si    | 1      | 0.6518         | 9.9998             | 3.3111  | 0.0373  | 13.3482 | 3S( 1.88)3p( 1.43)4S( 0.01)3d( 0.02)4p( 0.01) |
|                                | F     | 2      | -0.6518        | 2.0000             | 7.6389  | 0.0129  | 9.6518  | 2S( 1.94)2p( 5.69)3d( 0.01)                   |
|                                | Total |        | 0.0000         | 11.9998            | 10.9500 | 0.0502  | 23.0000 |                                               |
| SiF <sub>2</sub>               | F     | 1      | -0.6609        | 2.0000             | 7.6485  | 0.0124  | 9.6609  | 2S( 1.94)2p( 5.71)3d( 0.01)                   |
|                                | F     | 2      | -0.6609        | 2.0000             | 7.6485  | 0.0124  | 9.6609  | 2S( 1.94)2p( 5.71)3d( 0.01)                   |
|                                | Si    | 3      | 1.3219         | 9.9997             | 2.6160  | 0.0624  | 12.6782 | 3S( 1.75)3p( 0.87)4S( 0.02)3d( 0.03)4p( 0.01) |
|                                | Total |        | 0.0000         | 13.9997            | 17.9131 | 0.0872  | 32.0000 |                                               |
| SiF <sub>3</sub>               | Si    | 1      | 1.8617         | 9.9996             | 2.0406  | 0.0982  | 12.1383 | 3S( 0.98)3p( 1.06)4S( 0.03)3d( 0.05)4p( 0.02) |
|                                | F     | 2      | -0.6206        | 2.0000             | 7.6117  | 0.0089  | 9.6206  | 2S( 1.93)2p( 5.68)3d( 0.01)                   |
|                                | F     | 3      | -0.6206        | 2.0000             | 7.6117  | 0.0089  | 9.6206  | 2S( 1.93)2p( 5.68)3d( 0.01)                   |
|                                | F     | 4      | -0.6206        | 2.0000             | 7.6117  | 0.0089  | 9.6206  | 2S( 1.93)2p( 5.68)3d( 0.01)                   |
|                                | Total |        | 0.0000         | 15.9995            | 24.8756 | 0.1249  | 41.0000 |                                               |
| SiF <sub>4</sub>               | Si    | 1      | 2.4600         | 10.0000            | 1.4500  | 0.0901  | 11.5401 | 3S( 0.53)3p( 0.92)3d( 0.06)4p( 0.03)          |
|                                | F     | 2      | -0.6150        | 2.0000             | 7.6055  | 0.0095  | 9.6150  | 2S( 1.92)2p( 5.68)3d( 0.01)                   |
|                                | F     | 3      | -0.6150        | 2.0000             | 7.6055  | 0.0095  | 9.6150  | 2S( 1.92)2p( 5.68)3d( 0.01)                   |
|                                | F     | 4      | -0.6150        | 2.0000             | 7.6055  | 0.0095  | 9.6150  | 2S( 1.92)2p( 5.68)3d( 0.01)                   |
|                                | F     | 5      | -0.6150        | 2.0000             | 7.6055  | 0.0095  | 9.6150  | 2S( 1.92)2p( 5.68)3d( 0.01)                   |
|                                | Total |        | 0.0000         | 17.9999            | 31.8719 | 0.1282  | 50.0000 |                                               |
| Si <sub>2</sub> F <sub>6</sub> | Si    | 1      | 1.8567         | 9.9996             | 2.0568  | 0.0869  | 12.1433 | 3S( 0.86)3p( 1.20)4S( 0.01)3d( 0.06)4p( 0.02) |
|                                | Si    | 2      | 1.8567         | 9.9996             | 2.0569  | 0.0869  | 12.1434 | 3S( 0.86)3p( 1.20)4S( 0.01)3d( 0.06)4p( 0.02) |
|                                | F     | 3      | -0.6189        | 2.0000             | 7.6107  | 0.0082  | 9.6189  | 2S( 1.91)2p( 5.70)3d( 0.01)                   |
|                                | F     | 4      | -0.6189        | 2.0000             | 7.6108  | 0.0082  | 9.6189  | 2S( 1.91)2p( 5.70)3d( 0.01)                   |
|                                | F     | 5      | -0.6189        | 2.0000             | 7.6107  | 0.0082  | 9.6189  | 2S( 1.91)2p( 5.70)3d( 0.01)                   |
|                                | F     | 6      | -0.6189        | 2.0000             | 7.6107  | 0.0082  | 9.6189  | 2S( 1.91)2p( 5.70)3d( 0.01)                   |
|                                | F     | 7      | -0.6189        | 2.0000             | 7.6107  | 0.0082  | 9.6189  | 2S( 1.91)2p( 5.70)3d( 0.01)                   |
|                                | F     | 8      | -0.6189        | 2.0000             | 7.6108  | 0.0082  | 9.6189  | 2S( 1.91)2p( 5.70)3d( 0.01)                   |
|                                | total |        | 0.0000         | 31.9990            | 49.7779 | 0.2231  | 82.0000 |                                               |
| Si <sub>3</sub> F <sub>6</sub> | Si    | 1      | 1.2290         | 9.9986             | 2.6850  | 0.0873  | 12.771  | 3S( 1.13)3p( 1.55)4S( 0.01)3d( 0.06)4p( 0.02) |
|                                | Si    | 2      | 1.2290         | 9.9986             | 2.6850  | 0.0873  | 12.771  | 3S( 1.13)3p( 1.55)4S( 0.01)3d( 0.06)4p( 0.02) |
|                                | Si    | 3      | 1.2290         | 9.9986             | 2.6850  | 0.0873  | 12.771  | 3S( 1.13)3p( 1.55)4S( 0.01)3d( 0.06)4p( 0.02) |
|                                | F     | 4      | -0.6145        | 2.0000             | 7.6067  | 0.0078  | 9.6145  | 2S( 1.91)2p( 5.70)3d( 0.01)                   |
|                                | F     | 5      | -0.6145        | 2.0000             | 7.6067  | 0.0078  | 9.6145  | 2S( 1.91)2p( 5.70)3d( 0.01)                   |
|                                | F     | 6      | -0.6145        | 2.0000             | 7.6067  | 0.0078  | 9.6145  | 2S( 1.91)2p( 5.70)3d( 0.01)                   |
|                                | F     | 7      | -0.6145        | 2.0000             | 7.6067  | 0.0078  | 9.6145  | 2S( 1.91)2p( 5.70)3d( 0.01)                   |
|                                | F     | 8      | -0.6145        | 2.0000             | 7.6067  | 0.0078  | 9.6145  | 2S( 1.91)2p( 5.70)3d( 0.01)                   |
|                                | F     | 9      | -0.6145        | 2.0000             | 7.6067  | 0.0078  | 9.6145  | 2S( 1.91)2p( 5.70)3d( 0.01)                   |
| total                          |       | 0.0000 | 41.9957        | 53.6954            | 0.3089  | 96.0000 |         |                                               |
| Si <sub>3</sub> F <sub>8</sub> | F     | 1      | -0.6212        | 2.0000             | 7.6131  | 0.0081  | 9.6212  | 2S( 1.91)2p( 5.70)3d( 0.01)                   |
|                                | F     | 2      | -0.6212        | 2.0000             | 7.6131  | 0.0081  | 9.6212  | 2S( 1.91)2p( 5.70)3d( 0.01)                   |
|                                | F     | 3      | -0.6173        | 2.0000             | 7.6093  | 0.0081  | 9.6173  | 2S( 1.91)2p( 5.70)3d( 0.01)                   |

|                                 |       |        |         |         |         |         |          |                                               |
|---------------------------------|-------|--------|---------|---------|---------|---------|----------|-----------------------------------------------|
|                                 | F     | 4      | -0.6212 | 2.0000  | 7.6131  | 0.0081  | 9.6212   | 2S( 1.91)2p( 5.70)3d( 0.01)                   |
|                                 | F     | 5      | -0.6212 | 2.0000  | 7.6131  | 0.0081  | 9.6212   | 2S( 1.91)2p( 5.70)3d( 0.01)                   |
|                                 | F     | 6      | -0.6173 | 2.0000  | 7.6093  | 0.0081  | 9.6173   | 2S( 1.91)2p( 5.70)3d( 0.01)                   |
|                                 | F     | 7      | -0.6166 | 2.0000  | 7.6089  | 0.0078  | 9.6166   | 2S( 1.90)2p( 5.71)3d( 0.01)                   |
|                                 | F     | 8      | -0.6166 | 2.0000  | 7.6089  | 0.0078  | 9.6166   | 2S( 1.90)2p( 5.71)3d( 0.01)                   |
|                                 | Si    | 9      | 1.9205  | 9.9994  | 1.9937  | 0.0864  | 12.0795  | 3S( 0.83)3p( 1.17)3d( 0.06)4p( 0.02)          |
|                                 | Si    | 10     | 1.1115  | 9.9992  | 2.8066  | 0.0827  | 12.8885  | 3S( 1.12)3p( 1.68)3d( 0.06)4p( 0.02)          |
|                                 | Si    | 11     | 1.9205  | 9.9994  | 1.9937  | 0.0864  | 12.0795  | 3S( 0.83)3p( 1.17)3d( 0.06)4p( 0.02)          |
|                                 | total |        | 0.00000 | 45.9977 | 67.6827 | 0.3196  | 114.0000 |                                               |
| Si <sub>4</sub> F <sub>8</sub>  | Si    | 1      | 1.2255  | 29.9986 | 2.694   | 0.0819  | 12.7745  | 3S( 1.05)3p( 1.64)4S( 0.01)3d( 0.06)4p( 0.02) |
|                                 | Si    | 2      | 1.2255  | 9.9986  | 2.694   | 0.0819  | 12.7745  | 3S( 1.05)3p( 1.64)4S( 0.01)3d( 0.06)4p( 0.02) |
|                                 | Si    | 3      | 1.2255  | 9.9986  | 2.694   | 0.0819  | 12.7745  | 3S( 1.05)3p( 1.64)4S( 0.01)3d( 0.06)4p( 0.02) |
|                                 | F     | 4      | -0.6128 | 2.0000  | 7.6051  | 0.0077  | 9.6128   | 2S( 1.90)2p( 5.70)3d( 0.01)                   |
|                                 | F     | 5      | -0.6127 | 2.0000  | 7.6051  | 0.0077  | 9.6127   | 2S( 1.90)2p( 5.70)3d( 0.01)                   |
|                                 | F     | 6      | -0.6128 | 2.0000  | 7.6051  | 0.0077  | 9.6128   | 2S( 1.90)2p( 5.70)3d( 0.01)                   |
|                                 | F     | 7      | -0.6127 | 2.0000  | 7.6051  | 0.0077  | 9.6127   | 2S( 1.90)2p( 5.70)3d( 0.01)                   |
|                                 | F     | 8      | -0.6127 | 2.0000  | 7.6051  | 0.0077  | 9.6127   | 2S( 1.90)2p( 5.70)3d( 0.01)                   |
|                                 | F     | 9      | -0.6127 | 2.0000  | 7.6051  | 0.0077  | 9.6127   | 2S( 1.90)2p( 5.70)3d( 0.01)                   |
|                                 | F     | 10     | -0.6127 | 2.0000  | 7.6051  | 0.0077  | 9.6127   | 2S( 1.90)2p( 5.70)3d( 0.01)                   |
|                                 | F     | 11     | -0.6127 | 2.0000  | 7.6051  | 0.0077  | 9.6127   | 2S( 1.90)2p( 5.70)3d( 0.01)                   |
|                                 | Si    | 12     | 1.2255  | 9.9986  | 2.6940  | 0.0819  | 12.7745  | 3S( 1.05)3p( 1.64)4S( 0.01)3d( 0.06)4p( 0.02) |
|                                 | total |        | 0.0000  | 55.9943 | 71.6168 | 0.3889  | 128.0000 |                                               |
| Si <sub>4</sub> F <sub>10</sub> | Si    | 1      | 1.9185  | 9.9993  | 1.9955  | 0.0866  | 12.0815  | 3S( 0.83)3p( 1.17)4S( 0.01)3d( 0.06)4p( 0.02) |
|                                 | Si    | 2      | 1.1773  | 9.9989  | 2.7418  | 0.0821  | 12.8228  | 3S( 1.10)3p( 1.64)3d( 0.06)4p( 0.02)          |
|                                 | Si    | 3      | 1.1772  | 9.9989  | 2.7418  | 0.0821  | 12.8228  | 3S( 1.10)3p( 1.64)3d( 0.06)4p( 0.02)          |
|                                 | Si    | 4      | 1.9185  | 9.9993  | 1.9955  | 0.0866  | 12.0815  | 3S( 0.83)3p( 1.17)4S( 0.01)3d( 0.06)4p( 0.02) |
|                                 | F     | 5      | -0.6150 | 2.0000  | 7.6073  | 0.0077  | 9.6150   | 2S( 1.90)2p( 5.70)3d( 0.01)                   |
|                                 | F     | 6      | -0.6204 | 2.0000  | 7.6128  | 0.0077  | 9.6204   | 2S( 1.90)2p( 5.71)3d( 0.01)                   |
|                                 | F     | 7      | -0.6178 | 2.0000  | 7.6098  | 0.0081  | 9.6178   | 2S( 1.91)2p( 5.70)3d( 0.01)                   |
|                                 | F     | 8      | -0.6210 | 2.0000  | 7.613   | 0.0081  | 9.6210   | 2S( 1.91)2p( 5.70)3d( 0.01)                   |
|                                 | F     | 9      | -0.6215 | 2.0000  | 7.6135  | 0.0081  | 9.6215   | 2S( 1.91)2p( 5.70)3d( 0.01)                   |
|                                 | F     | 10     | -0.6150 | 2.0000  | 7.6073  | 0.0077  | 9.6150   | 2S( 1.90)2p( 5.70)3d( 0.01)                   |
|                                 | F     | 11     | -0.6204 | 2.0000  | 7.6128  | 0.0077  | 9.6204   | 2S( 1.90)2p( 5.71)3d( 0.01)                   |
|                                 | F     | 12     | -0.6178 | 2.0000  | 7.6098  | 0.0081  | 9.6178   | 2S( 1.91)2p( 5.70)3d( 0.01)                   |
|                                 | F     | 13     | -0.6215 | 2.0000  | 7.6135  | 0.0081  | 9.6215   | 2S( 1.91)2p( 5.70)3d( 0.01)                   |
|                                 | F     | 14     | -0.6210 | 2.0000  | 7.6130  | 0.0081  | 9.6210   | 2S( 1.91)2p( 5.70)3d( 0.01)                   |
| total                           |       | 0.0000 | 59.9963 | 85.5872 | 0.4165  | 46.0000 |          |                                               |
| Si <sub>5</sub> F <sub>10</sub> | Si    | 1      | 1.2333  | 9.9987  | 2.6848  | 0.0832  | 12.7667  | 3S( 1.08)3p( 1.61)4S( 0.01)3d( 0.06)4p( 0.02) |
|                                 | Si    | 2      | 1.2334  | 9.9987  | 2.6847  | 0.0832  | 12.7666  | 3S( 1.08)3p( 1.61)4S( 0.01)3d( 0.06)4p( 0.02) |
|                                 | Si    | 3      | 1.2318  | 9.9986  | 2.6862  | 0.0834  | 12.7682  | 3S( 1.07)3p( 1.61)4S( 0.01)3d( 0.06)4p( 0.02) |
|                                 | Si    | 4      | 1.2308  | 9.9986  | 2.6871  | 0.0834  | 12.7692  | 3S( 1.07)3p( 1.61)4S( 0.01)3d( 0.06)4p( 0.02) |
|                                 | Si    | 5      | 1.2316  | 9.9986  | 2.6863  | 0.0834  | 12.7684  | 3S( 1.07)3p( 1.61)4S( 0.01)3d( 0.06)4p( 0.02) |
|                                 | F     | 6      | -0.6134 | 2.0000  | 7.6058  | 0.0077  | 9.6134   | 2S( 1.90)2p( 5.70)3d( 0.01)                   |
|                                 | F     | 7      | -0.6190 | 2.0000  | 7.6115  | 0.0076  | 9.6190   | 2S( 1.90)2p( 5.71)3d( 0.01)                   |

|                                 |       |    |         |         |          |        |          |                                               |
|---------------------------------|-------|----|---------|---------|----------|--------|----------|-----------------------------------------------|
|                                 | F     | 8  | -0.6130 | 2.0000  | 7.6053   | 0.0077 | 9.6130   | 2S( 1.90)2p( 5.70)3d( 0.01)                   |
|                                 | F     | 9  | -0.6199 | 2.0000  | 7.6124   | 0.0076 | 9.6199   | 2S( 1.90)2p( 5.71)3d( 0.01)                   |
|                                 | F     | 10 | -0.6135 | 2.0000  | 7.6059   | 0.0077 | 9.6135   | 2S( 1.90)2p( 5.70)3d( 0.01)                   |
|                                 | F     | 11 | -0.6188 | 2.0000  | 7.6113   | 0.0076 | 9.6188   | 2S( 1.90)2p( 5.71)3d( 0.01)                   |
|                                 | F     | 12 | -0.6149 | 2.0000  | 7.6073   | 0.0077 | 9.6149   | 2S( 1.90)2p( 5.70)3d( 0.01)                   |
|                                 | F     | 13 | -0.6167 | 2.0000  | 7.6091   | 0.0076 | 9.6166   | 2S( 1.90)2p( 5.71)3d( 0.01)                   |
|                                 | F     | 14 | -0.6147 | 2.0000  | 7.6071   | 0.0077 | 9.6147   | 2S( 1.90)2p( 5.70)3d( 0.01)                   |
|                                 | F     | 15 | -0.6169 | 2.0000  | 7.6093   | 0.0076 | 9.6169   | 2S( 1.90)2p( 5.71)3d( 0.01)                   |
|                                 | total |    | 0.0000  | 69.9931 | 89.5140  | 0.4929 | 160.0000 |                                               |
| Si <sub>5</sub> F <sub>12</sub> | Si    | 1  | 1.9196  | 9.9993  | 1.9950   | 0.0861 | 12.0804  | 3S( 0.83)3p( 1.16)3d( 0.06)4p( 0.02)          |
|                                 | Si    | 2  | 1.2372  | 9.9987  | 2.6829   | 0.0812 | 12.7628  | 3S( 1.08)3p( 1.60)3d( 0.05)4p( 0.02)          |
|                                 | Si    | 3  | 1.17805 | 9.9989  | 2.7407   | 0.0823 | 12.8220  | 3S( 1.10)3p( 1.64)3d( 0.06)4p( 0.02)          |
|                                 | Si    | 4  | 1.1781  | 9.9989  | 2.7407   | 0.0823 | 12.8219  | 3S( 1.10)3p( 1.64)3d( 0.06)4p( 0.02)          |
|                                 | Si    | 5  | 1.9196  | 9.9993  | 1.9950   | 0.0861 | 12.0805  | 3S( 0.83)3p( 1.16)3d( 0.06)4p( 0.02)          |
|                                 | F     | 6  | -0.6201 | 2.0000  | 7.6121   | 0.0081 | 9.6201   | 2S( 1.91)2p( 5.70)3d( 0.01)                   |
|                                 | F     | 7  | -0.6227 | 2.0000  | 7.6147   | 0.0080 | 9.6227   | 2S( 1.91)2p( 5.70)3d( 0.01)                   |
|                                 | F     | 8  | -0.6177 | 2.0000  | 7.6096   | 0.0080 | 9.6177   | 2S( 1.91)2p( 5.70)3d( 0.01)                   |
|                                 | F     | 9  | -0.6193 | 2.0000  | 7.6117   | 0.0077 | 9.6193   | 2S( 1.90)2p( 5.71)3d( 0.01)                   |
|                                 | F     | 10 | -0.6163 | 2.0000  | 7.6086   | 0.0077 | 9.6162   | 2S( 1.90)2p( 5.71)3d( 0.01)                   |
|                                 | F     | 11 | -0.6202 | 2.0000  | 7.6126   | 0.0076 | 9.6202   | 2S( 1.90)2p( 5.71)3d( 0.01)                   |
|                                 | F     | 12 | -0.6202 | 2.0000  | 7.6126   | 0.0076 | 9.6202   | 2S( 1.90)2p( 5.71)3d( 0.01)                   |
|                                 | F     | 13 | -0.6163 | 2.0000  | 7.6086   | 0.0077 | 9.6163   | 2S( 1.90)2p( 5.71)3d( 0.01)                   |
|                                 | F     | 14 | -0.6193 | 2.0000  | 7.6117   | 0.0077 | 9.6201   | 2S( 1.90)2p( 5.71)3d( 0.01)                   |
|                                 | F     | 15 | -0.6201 | 2.0000  | 7.6121   | 0.0081 | 9.6201   | 2S( 1.91)2p( 5.70)3d( 0.01)                   |
|                                 | F     | 16 | -0.6176 | 2.0000  | 7.6096   | 0.0080 | 9.6176   | 2S( 1.91)2p( 5.70)3d( 0.01)                   |
|                                 | F     | 17 | -0.6227 | 2.0000  | 7.6147   | 0.0080 | 9.6227   | 2S( 1.91)2p( 5.70)3d( 0.01)                   |
|                                 | total |    | 0.0000  | 73.9949 | 103.4928 | 0.5122 | 178.0000 |                                               |
| Si <sub>6</sub> F <sub>12</sub> | Si    | 1  | 1.2335  | 9.9986  | 2.6838   | 0.0840 | 12.7665  | 3S( 1.07)3p( 1.62)4S( 0.01)3d( 0.06)4p( 0.02) |
|                                 | Si    | 2  | 1.2332  | 9.9986  | 2.6841   | 0.0841 | 12.7668  | 3S( 1.07)3p( 1.62)4S( 0.01)3d( 0.06)4p( 0.02) |
|                                 | Si    | 3  | 1.2337  | 9.9986  | 2.6837   | 0.0841 | 12.7664  | 3S( 1.07)3p( 1.62)4S( 0.01)3d( 0.06)4p( 0.02) |
|                                 | Si    | 4  | 1.2335  | 9.9986  | 2.6838   | 0.0841 | 12.7665  | 3S( 1.07)3p( 1.62)4S( 0.01)3d( 0.06)4p( 0.02) |
|                                 | Si    | 5  | 1.2333  | 9.9986  | 2.6841   | 0.0841 | 12.7668  | 3S( 1.07)3p( 1.62)4S( 0.01)3d( 0.06)4p( 0.02) |
|                                 | F     | 6  | 1.2337  | 9.9986  | 2.6836   | 0.0841 | 12.7663  | 3S( 1.07)3p( 1.62)4S( 0.01)3d( 0.06)4p( 0.02) |
|                                 | F     | 7  | -0.6127 | 2.0000  | 7.6051   | 0.0076 | 9.6127   | 2S( 1.90)2p( 5.70)3d( 0.01)                   |
|                                 | F     | 8  | -0.6207 | 2.0000  | 7.6132   | 0.0075 | 9.6208   | 2S( 1.90)2p( 5.71)3d( 0.01)                   |
|                                 | F     | 9  | -0.6127 | 2.0000  | 7.6052   | 0.0076 | 9.6127   | ]2S( 1.90)2p( 5.70)3d( 0.01)                  |
|                                 | F     | 10 | -0.6208 | 2.0000  | 7.6132   | 0.0075 | 9.6208   | 2S( 1.90)2p( 5.71)3d( 0.01)                   |
|                                 | F     | 11 | -0.6127 | 2.0000  | 7.6052   | 0.0076 | 9.6127   | 2S( 1.90)2p( 5.70)3d( 0.01)                   |
|                                 | F     | 12 | -0.6207 | 2.0000  | 7.6132   | 0.0076 | 9.6207   | 2S( 1.90)2p( 5.71)3d( 0.01)                   |
|                                 | F     | 13 | -0.6127 | 2.0000  | 7.6051   | 0.0076 | 9.6127   | 2S( 1.90)2p( 5.70)3d( 0.01)                   |
|                                 | F     | 14 | -0.6208 | 2.0000  | 7.6132   | 0.0075 | 9.6208   | 2S( 1.90)2p( 5.71)3d( 0.01)                   |
|                                 | F     | 15 | -0.6127 | 2.0000  | 7.6052   | 0.0075 | 9.6127   | 2S( 1.90)2p( 5.70)3d( 0.01)                   |
|                                 | F     | 16 | -0.6208 | 2.0000  | 7.6133   | 0.0075 | 9.6208   | 2S( 1.90)2p( 5.71)3d( 0.01)                   |
|                                 | F     | 17 | -0.6207 | 2.0000  | 7.6132   | 0.0075 | 9.6207   | 2S( 1.90)2p( 5.71)3d( 0.01)                   |



|  |       |    |         |         |          |        |          |                             |
|--|-------|----|---------|---------|----------|--------|----------|-----------------------------|
|  | F     | 18 | -0.6127 | 2.0000  | 7.6052   | 0.0076 | 9.6128   | 2S( 1.90)2p( 5.70)3d( 0.01) |
|  | total |    | 0.0000  | 83.9916 | 107.4133 | 0.5951 | 192.0000 |                             |

## References

- 1 J. M. Bassler, P. L. Timms, J. L. Margrave, *Inorg Chem*, 1966, **5**, 729-732.
- 2 W. D. Reents, D. L. Wood, A. M. Mujsee, *Analytical Chemistry*, 1985, **57**, 104-109.
- 3 E. Hengge, S. Waldhor, *Z Naturforsch B: Chem Sci*, 1974, **B29**, 437-437.
- 4 T. Noda, H. Suzuki, H. Araki, et al, *Journal of Nuclear Materials*, 1996, **233**, 1496-1499.
- 5 J. L. Lyman, B. E. Newnam, T. Noda, et al, *The Journal of Physical Chemistry A*, 1999, **103**, 4227-4232.
- 6 Lyman, L. John, *Journal of Physical & Chemical Reference Data*, 2001, **30**, 165-186.
